# Supplementary material for: Possible Association of Energy Availability with Transferrin Saturation and Serum Iron during Summer Camp in Male Collegiate Rugby Players
Source: MDPI journal article supplement (doi:10.3390/nu13092963), 2021-08-26
Supplement: s1 [file s1]

## Supplementary

**Table S1.** Biochemical and hematological parameters during the training camp.

|          | Reference Range |                      | Position | n | Pre      |        | Mid      |        | Post |          |        |          |
|----------|-----------------|----------------------|----------|---|----------|--------|----------|--------|------|----------|--------|----------|
|          |                 |                      |          |   | EMM      | SE     | EMM      | SE     | EMM  | SE       |        |          |
| ALB      | 3.8–5.3         | g/dL                 | T5       | 7 | 4.7      | 0.1    | 4.7      | 0.1    |      | 4.7      | < 0.1  |          |
|          |                 |                      | BR       | 4 | 4.7      | < 0.1  | 4.8      | < 0.1  | **   | 4.6      | 0.1    | #        |
|          |                 |                      | BK       | 8 | 4.6      | 0.1    | 4.7      | < 0.1  |      | 4.6      | 0.1    |          |
| CK       | 50–250          | U/L                  | T5       | 7 | 811.6    | 173.2  | 758.0    | 108.5  |      | 411.3    | 87.2   | **, ###  |
|          |                 |                      | BR       | 4 | 1834.3   | 305.6  | 1233.8   | 186.9  |      | 659.3    | 147.6  | ***, ### |
|          |                 |                      | BK       | 8 | 315.1    | 86.7   | 802.5    | 101.7  | ***  | 436.9    | 53.8   | ***, ### |
| Hepcidin | 79.0–49,000     | pg/mL                | T5       | 7 | 23,651.2 | 4454.6 | 17,755.4 | 1843.5 |      | 15,556.4 | 2642.0 |          |
|          |                 |                      | BR       | 4 | 22,465.9 | 3199.9 | 17,994.0 | 1636.9 |      | 13,715.6 | 1755.2 |          |
|          |                 |                      | BK       | 8 | 10,776.7 | 1747.1 | 12,821.0 | 714.7  |      | 12,343.8 | 2331.6 |          |
| WBC      | 3900–9800       | /μL                  | T5       | 7 | 5957.1   | 384.3  | 6528.6   | 664.8  | **   | 5942.9   | 578.5  | *        |
|          |                 |                      | BR       | 4 | 6875.0   | 89.3   | 6425.0   | 138.6  |      | 6025.0   | 460.1  |          |
|          |                 |                      | BK       | 8 | 5625.0   | 284.9  | 6062.5   | 360.5  | *    | 6162.5   | 526.8  |          |
| RBC      | 427–570         | ×10 <sup>4</sup> /μL | T5       | 7 | 512.3    | 9.1    | 510.1    | 12.4   |      | 514.6    | 8.4    |          |
|          |                 |                      | BR       | 4 | 487.3    | 5.6    | 499.3    | 7.7    | ***  | 497.0    | 7.5    | **, #    |
|          |                 |                      | BK       | 8 | 512.8    | 12.3   | 509.0    | 12.8   |      | 510.9    | 13.4   |          |
| Hb       | 13.5–17.6       | g/dL                 | T5       | 7 | 15.1     | 0.3    | 15.1     | 0.2    |      | 15.3     | 0.1    |          |
|          |                 |                      | BR       | 4 | 14.9     | 0.4    | 15.1     | 0.4    | *    | 15.0     | 0.5    | **       |
|          |                 |                      | BK       | 8 | 15.5     | 0.3    | 15.4     | 0.3    |      | 15.6     | 0.4    |          |
| Hct      | 39.8–51.8       | %                    | T5       | 7 | 46.8     | 1.1    | 46.5     | 0.7    |      | 48.3     | 0.4    | ##       |
|          |                 |                      | BR       | 4 | 45.4     | 0.8    | 46.2     | 1.1    | **   | 47.2     | 1.3    | **, #    |
|          |                 |                      | BK       | 8 | 48.3     | 0.8    | 46.9     | 0.6    | ***  | 48.4     | 1.0    | #        |
| MCV      | 83–102          | fL                   | T5       | 7 | 91.6     | 1.6    | 91.1     | 1.5    |      | 94.0     | 1.4    | ***, ### |
|          |                 |                      | BR       | 4 | 93.5     | 1.1    | 92.8     | 1.1    | ***  | 95.0     | 1.1    | ##       |
|          |                 |                      | BK       | 8 | 94.4     | 1.0    | 92.3     | 1.3    | ***  | 95.0     | 1.1    | *, ###   |
| MCH      | 28.0–34.6       | pg                   | T5       | 7 | 29.5     | 0.5    | 29.6     | 0.4    |      | 29.8     | 0.5    |          |
|          |                 |                      | BR       | 4 | 30.5     | 0.6    | 30.1     | 0.6    |      | 30.2     | 0.6    | **       |
|          |                 |                      | BK       | 8 | 30.2     | 0.4    | 30.3     | 0.4    |      | 30.5     | 0.3    | *        |
| MCHC     | 31.6–36.6       | %                    | T5       | 7 | 32.3     | 0.2    | 32.4     | 0.2    |      | 31.7     | 0.2    | **, ###  |
|          |                 |                      | BR       | 4 | 32.7     | 0.3    | 32.6     | 0.3    |      | 31.8     | 0.4    | **, ##   |
|          |                 |                      | BK       | 8 | 32.1     | 0.2    | 32.8     | 0.2    | ***  | 32.1     | 0.2    | ###      |
| PLT      | 13.0–36.9       | ×10 <sup>4</sup> /μL | T5       | 7 | 25.3     | 1.3    | 26.2     | 1.5    |      | 26.3     | 1.7    |          |
|          |                 |                      | BR       | 4 | 28.4     | 1.7    | 28.2     | 1.9    |      | 27.3     | 1.4    | *        |
|          |                 |                      | BK       | 8 | 23.5     | 1.4    | 22.9     | 2.0    |      | 25.7     | 1.0    | **, #    |

EMM estimated marginal mean; SE standard error; \*  $p < 0.05$ , \*\*  $p < 0.01$ , \*\*\*  $p < 0.001$  vs. Pre; #  $p < 0.05$ , ##  $p < 0.01$ , ###  $p < 0.001$  vs. Mid; T5, Tight-5 (numbers 1–5); BR, Back row (numbers 6–8); and BK, Backs (numbers 9–15).

## Supplementary

**Table S2.** Physical activity in the first half of the pre-season camp.

[illegible]

|            |                      |         |     |     |       |     |      |     |         |     |       |     |       |     |         |      |
|------------|----------------------|---------|-----|-----|-------|-----|------|-----|---------|-----|-------|-----|-------|-----|---------|------|
| Exercise   | Yoga                 | 02160   | 4   | 30  | 2     |     |      | 30  | 2       | 30  | 2     | 30  | 2     | 30  | 2       | 2.0  |
|            | Team practice        | 15560   | 8.3 | 150 | 20.75 | 60  | 8.3  |     |         | 150 | 20.75 | 150 | 20.75 |     |         | 17.6 |
|            | Stretch              | 02101   | 2.3 | 30  | 1.15  | 30  | 1.15 | 30  | 1.15    | 30  | 1.15  | 30  | 1.15  | 30  | 1.15    | 1.2  |
|            | Unit training        | 15560   | 8.3 | 150 | 20.75 | 120 | 16.6 |     |         | 120 | 16.6  | 90  | 12.45 |     |         | 16.6 |
|            | Skill training       | 15562   | 6.3 | 150 | 15.75 |     |      | 60  | 6.3     |     |       | 60  | 6.3   |     |         | 9.5  |
|            | Core exercise        | 02160   | 4   |     |       | 30  | 2    |     |         |     |       |     |       |     |         | 2.0  |
|            | Weight training      | 02050   | 6   |     |       | 120 | 12   |     |         |     |       |     |       |     |         | 12.0 |
|            | Strength and Fitness | 02050   | 6   |     |       |     |      | 60  | 6       |     |       |     |       |     |         | 6.0  |
|            | Fitness              | 02040   | 8   |     |       |     |      |     |         | 150 | 20    |     |       |     |         | 20.0 |
|            | Cap Run              | 12010   | 6   |     |       |     |      |     |         |     |       |     |       | 60  | 6       | 6.0  |
|            | Pool                 | 18367   | 2.5 |     |       |     |      |     |         |     |       |     |       |     |         |      |
|            | Game                 | 15560   | 8.3 |     |       |     |      | 80  | 11.0667 |     |       |     |       | 80  | 11.0667 | 11.1 |
|            | Personal Training    | 02052   | 5   | 60  | 5     | 60  | 5    | 120 | 10      | 60  | 5     | 60  | 5     | 120 | 10      | 6.7  |
|            | Physical activity    | METS·h  |     |     | 65.4  |     | 45.1 |     | 36.5    |     | 65.5  |     | 47.7  |     | 30.2    | 48.4 |
|            | Energy expenditure   | kcal/kg |     |     | 68.7  |     | 47.3 |     | 38.3    |     | 68.8  |     | 50.0  |     | 31.7    | 50.8 |
| Activity   | Recreation           | 07023   | 1.8 | 210 | 6.3   | 360 | 10.8 | 400 | 12      | 240 | 7.2   | 360 | 10.8  | 460 | 13.8    |      |
| other than | Meal                 | 07022   | 1.5 | 180 | 4.5   | 180 | 4.5  | 180 | 4.5     | 180 | 4.5   | 180 | 4.5   | 180 | 4.5     |      |
| exercise   | Sleep                | 07030   | 1   | 480 | 8     | 480 | 8    | 480 | 8       | 480 | 8     | 480 | 8     | 480 | 8       |      |
|            | Physical activity    | METS·h  |     |     | 18.8  |     | 23.3 |     | 24.5    |     | 19.7  |     | 23.3  |     | 26.3    | 22.7 |
|            | Energy expenditure   | kcal/kg |     |     | 19.7  |     | 24.5 |     | 25.7    |     | 20.7  |     | 24.5  |     | 27.6    | 23.8 |
| Total      | Physical activity    | METS·h  |     |     | 84.2  |     | 68.4 |     | 61.0    |     | 85.2  |     | 71.0  |     | 56.5    | 71.0 |
|            | Energy expenditure   | kcal/kg |     |     | 88.4  |     | 71.8 |     | 64.1    |     | 89.5  |     | 74.5  |     | 59.3    | 74.6 |
